# Supplementary material for: Selective clearance of aberrant tau proteins and rescue of neurotoxicity by transcription factor EB
Source: PubMed Central journal article supplement (PMC4197862; doi:10.15252/emmm.201303671), 2014-07-28
Supplement: emmm0006-1142-SD3.pdf [file emmm0006-1142-SD3.pdf]

# Supplementary Figure 9A

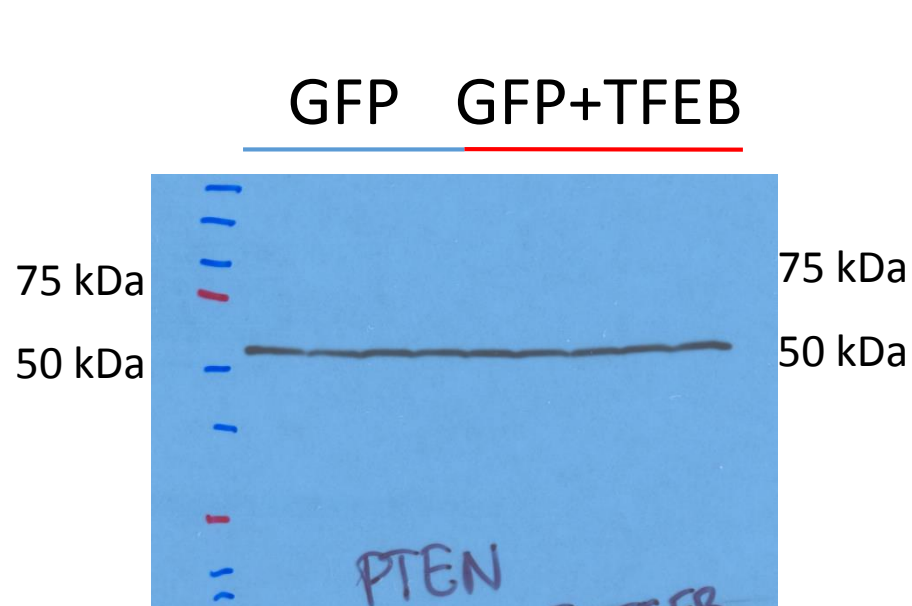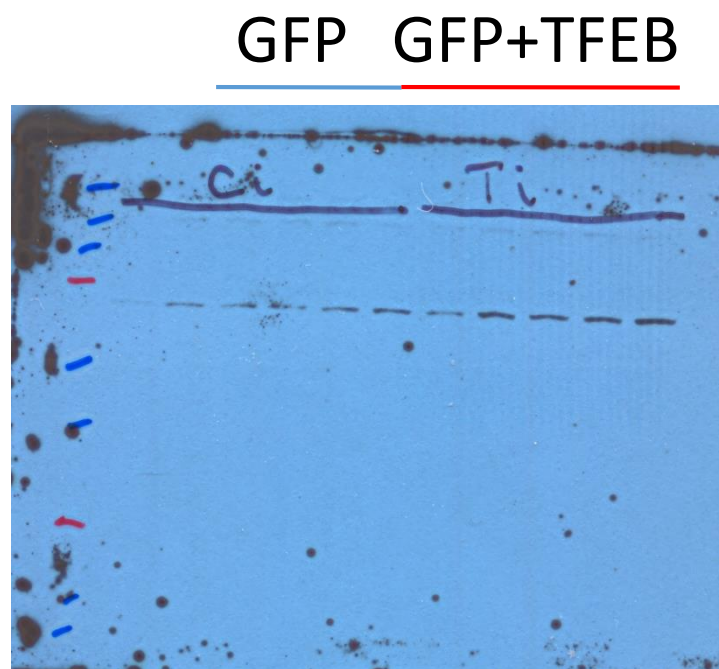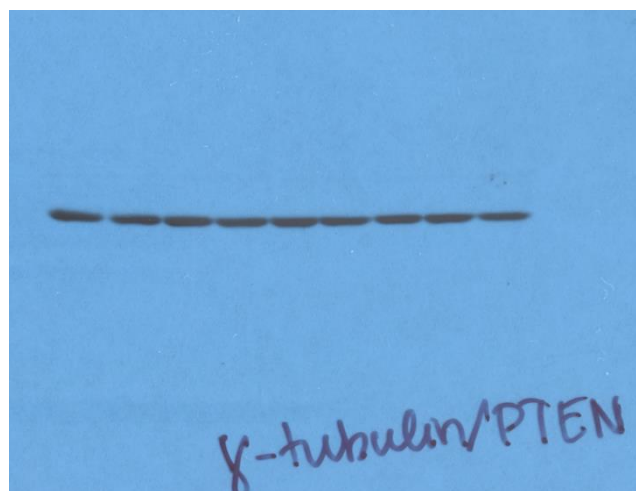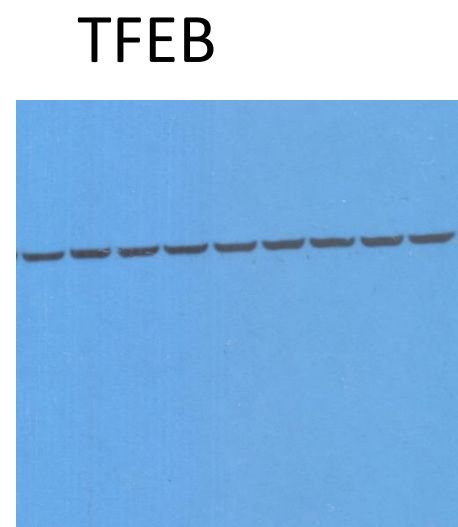

$\gamma$ -tubulin

# Supplementary Figure 9 C

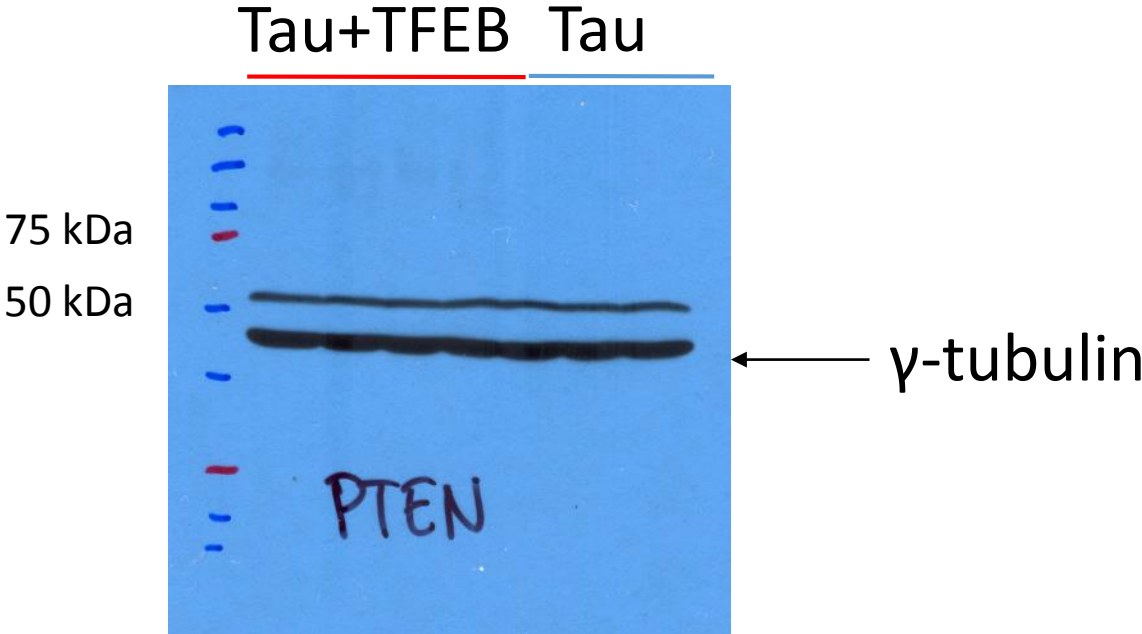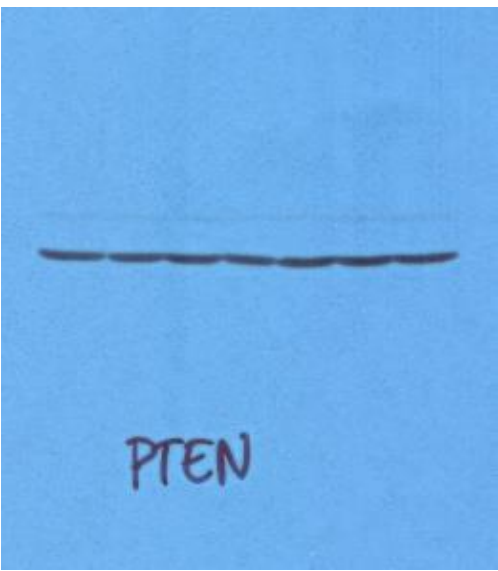

$\gamma$ -tubulin
