# Supplementary material for: Selective clearance of aberrant tau proteins and rescue of neurotoxicity by transcription factor EB
Source: PubMed Central journal article supplement (PMC4197862; doi:10.15252/emmm.201303671), 2014-07-28

# Figure 1C

Tau+TFEB    Tau    WT+TFEB    WT    Tau+TFEB    Tau    WT+TFEB    WT

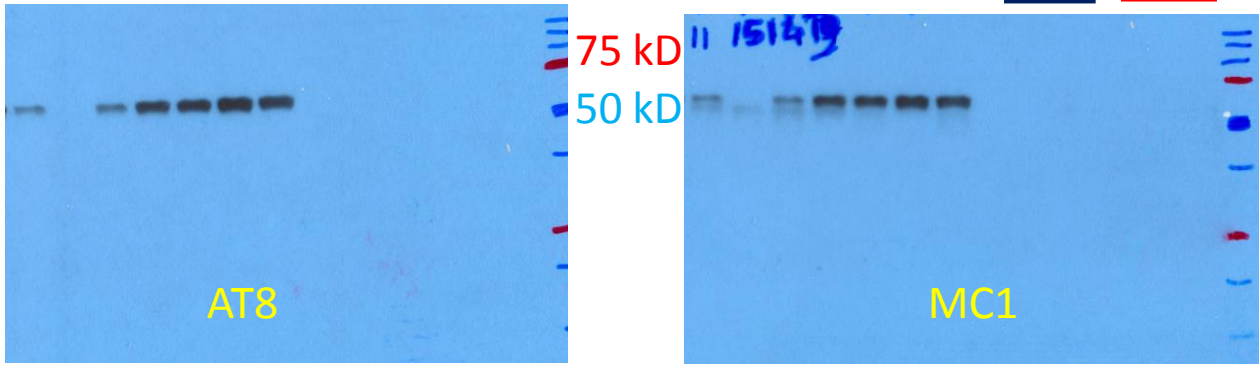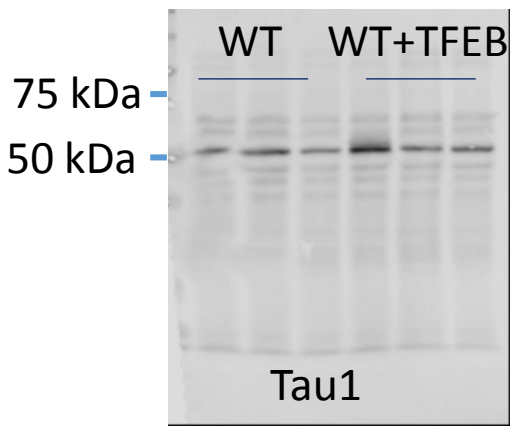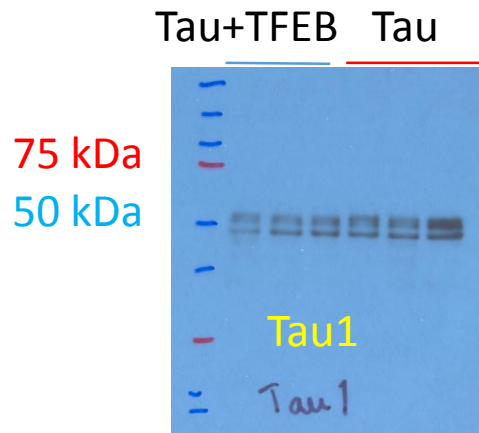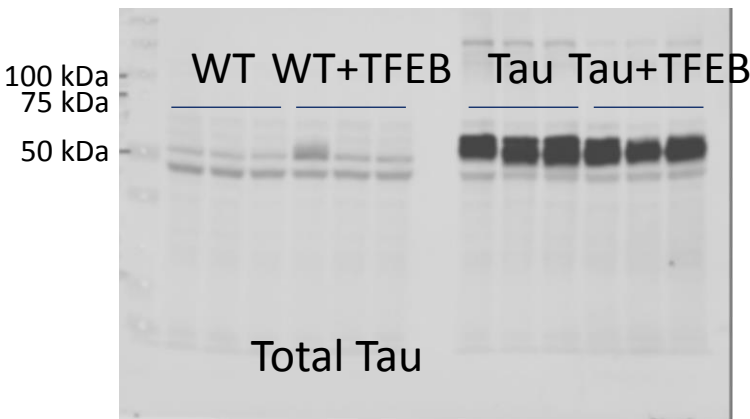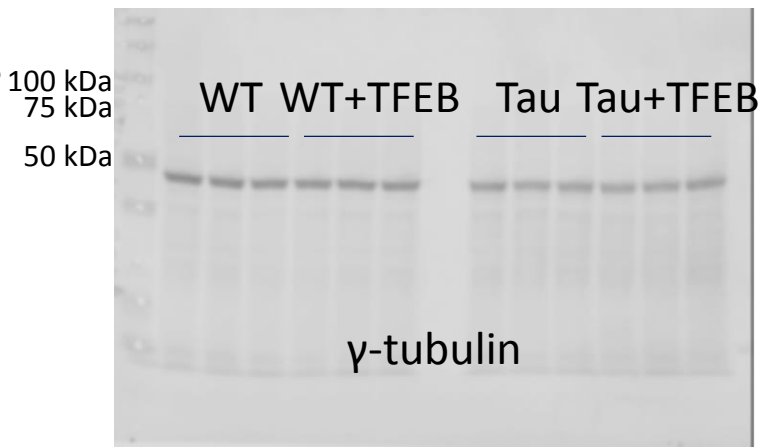

Figure 1D

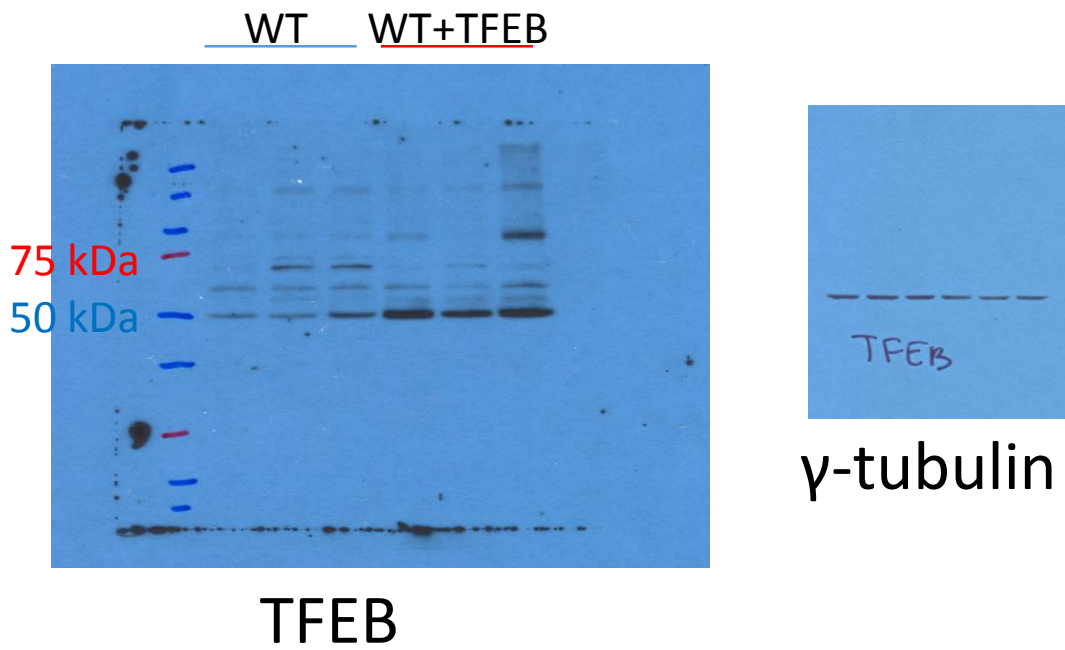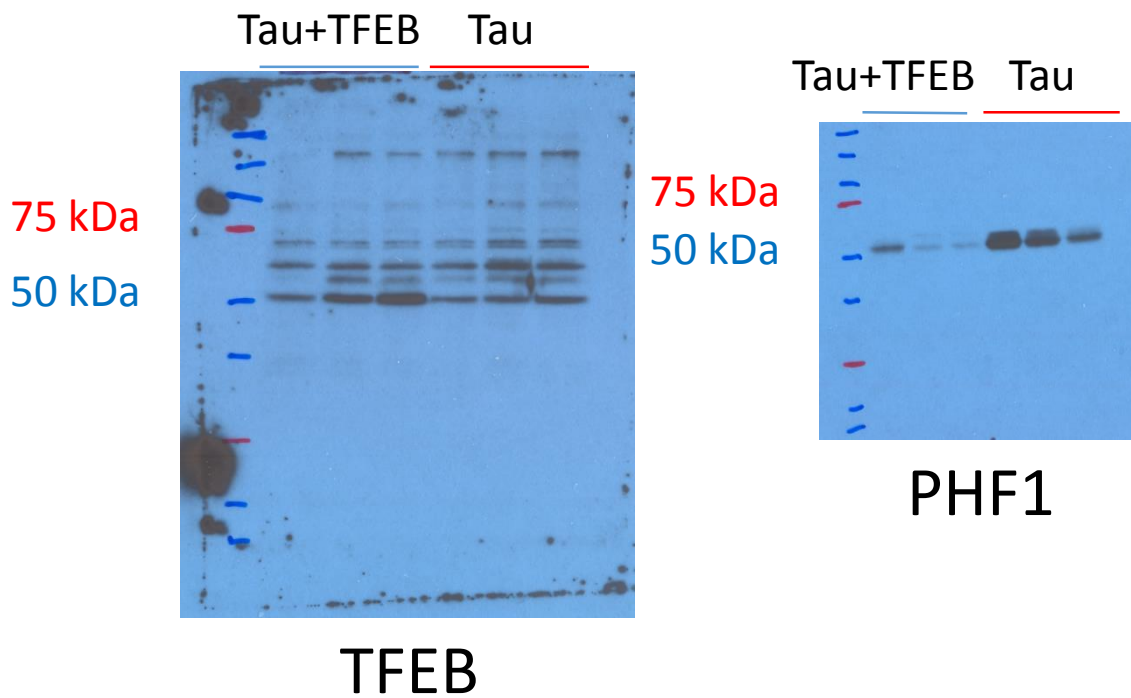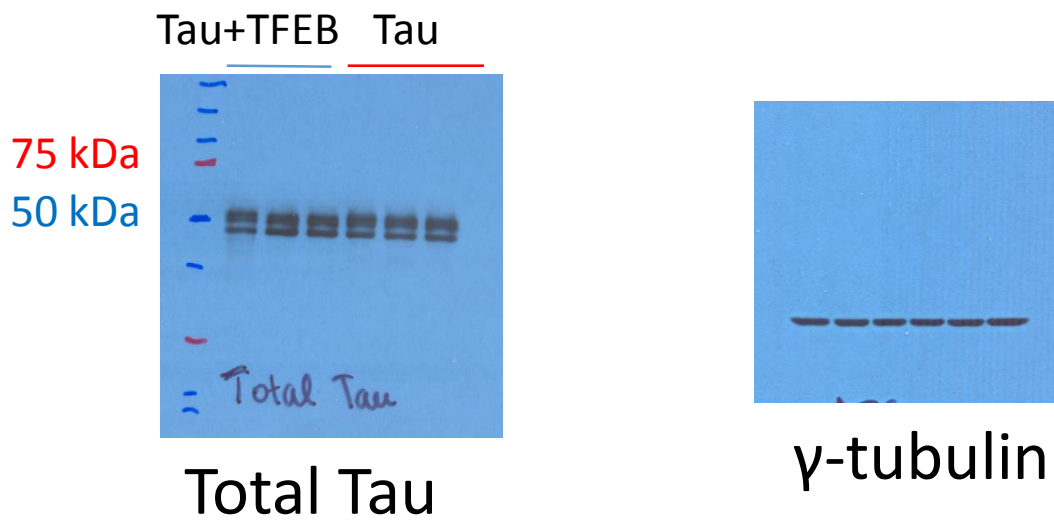

Supplement: emmm0006-1142-SD5.pdf [file emmm0006-1142-SD5.pdf]
